# Supplementary material
Source: Research Square preprint supplement (doi:10.21203/rs.3.rs-8767361/v1)
Supplement: Supplementary file 1 [file 3691edfde5d4c6dc1e984e9a.xlsx]

## Sheet: Key
Supplementary Tables
Supplementary Table 1	Gene cloning and related primers
Supplementary Table 2	Antibodies
Supplementary Table 3	Target sequences of siRNA and shRNA
Supplementary Table 4	Oligonucleotides used in this study

## Sheet: S1 Gene cloning
Supplementary Table 1
No.	primer	Sequence 5' to 3'	target	restriction site	vector	Tag	experiment
1	ZC3H13-F	atttcaggtgtcgtgaggatcc atgtcaaaaattagaaggaag	ZC3H13	BamH1	pLV-EF1a-IRES-Hygro		ZC3H13-OE
2	ZC3H13-R	gcggccgccctcgaggaattc ttaCTTATCGTCGTCATCCTTGTAATCaagtaaaatgaaactacc	ZC3H13	EcoR1	pLV-EF1a-IRES-Hygro	V5
3	PMEPA1-F	agattctagagctagcgaatt atgcaccgcttgatgggggtc	PMEPA1	EcoR1	pCDH-CMV-MCS-EF1-CopGFP-T2A-Puro		PMEPA1-OE
4	PMEPA1-R	gatccttgcggccgcggatcc cta TTACTTATCGTCGTCATCCTTGTAATC gagagggtgtcctttctg	PMEPA1	BamH1	pCDH-CMV-MCS-EF1-CopGFP-T2A-Puro	Flag
5	PMEPA1-F	CTTGGTACCGAGCTCGGATCC atgcaccgcttgatgggggtc	PMEPA1	BamHI	pcDNA3.1-V5-His-A		Co-IP
6	PMEPA1-R	GCCCTCTAGACTCGAGCGGCCGCCA gagagggtgtcctttctg	PMEPA1	NotI	pcDNA3.1-V5-His-A	V5
7	PTEN-F	agattctagagctagcgaatt atgacagccatcatcaaagag	PTEN	EcoR1	pCDH-CMV-MCS-EF1-CopGFP-T2A-Puro		Co-IP
8	PTEN-R	gatccttgcggccgcggatcc tca CTTATCGTCGTCATCCTTGTAATC gacttttgtaatttgtgt	PTEN	BamH1	pCDH-CMV-MCS-EF1-CopGFP-T2A-Puro	Flag

## Sheet: S2 Antibodies
Supplementary Table 2
No.	Name	Target	Company	Cat. No.	Experiment
1	Anti-ZC3H13 antibody	human/mouse ZC3H13	Abcam	ab70802	WB, IP, IF
2	METTL14 Polyclonal antibody	human/mouse METTL14	Proteintech	26158-1-AP	WB, IP
3	Lamin B1 Polyclonal antibody	human/mouse Lamin B1	Proteintech	12987-1-AP	WB
4	GAPDH Monoclonal antibody	human/mouse GAPDH	Proteintech	60004-1-Ig	WB
5	Beta Actin Monoclonal antibody	human/mouse Beta Actin	Proteintech	66009-1-Ig	WB
6	Rpb1 NTD (D8L4Y) Rabbit Monoclonal Antibody	human/mouse Pol II NTD	Cell Signaling Technology	#14958	WB, IP, IF
7	Rpb1 CTD (4H8) Mouse Monoclonal Antibody	human/mouse Pol II CTD	Cell Signaling Technology	#2629	WB, IP
8	Phospho-Rpb1 CTD (Ser2) (E1Z3G) Rabbit Monoclonal Antibody	human/mouse Pol II CTD pSer2	Cell Signaling Technology	#13499	WB, IP
9	Phospho-Rpb1 CTD (Ser5) (D9N5I) Rabbit Monoclonal Antibody	human/mouse Pol II CTD pSer5	Cell Signaling Technology	#13523	WB, IP
10	WTAP Monoclonal antibody	human/mouse WTAP	Proteintech	60188-1-Ig	WB
11	PMEPA1 Polyclonal antibody	human/mouse PMEPA1	Proteintech	16521-1-AP	WB, IP
12	Anti-N6-methyladenosine (m6A)	human/mouse m6A	Millipore	ABE572-I-100UG	MeRIP, Dot Plot
13	PTEN (138G6) Rabbit Monoclonal Antibody	human/mouse PTEN	Cell Signaling Technology	#9559	WB, IHC, IP
14	Akt Antibody	human/mouse Akt	Cell Signaling Technology	#9272	WB
15	Phospho-Akt (Ser473) (D9E) Rabbit Monoclonal Antibody	human/mouse p-Akt	Cell Signaling Technology	#4060	WB
16	Recombinant NEDD4 Antibody	human/mouse NEDD4	Aladdin	Ab117482	WB
17	Anti-Androgen Receptor	human/mouse Androgen Receptor	Abcam	ab108341	IHC
18	Monoclonal ANTI-FLAG	Flag tag	Sigma-Aldrich	F1804	WB, IP
19	V5-tag Polyclonal antibody	V5 tag	Proteintech	14440-1-AP	WB, IP
20	HA tag Polyclonal antibody	HA tag	Proteintech	51064-2-AP	WB, IP
21	SMAD2/3 Antibody	human/mouse SMAD2/3	Cell Signaling Technology	#5678	WB
22	Ki-67 Polyclonal antibody	human/mouse Ki-67	Proteintech	27309-1-AP	IHC
23	E-cadherin Polyclonal antibody	human/mouse E-cadherin	Proteintech	20874-1-AP	IHC
24	N-cadherin Polyclonal antibody	human/mouse N-cadherin	Proteintech	22018-1-AP	IHC
25	Alpha Tubulin Monoclonal antibody	human/mouse Alpha Tubulin	Proteintech	66031-1-Ig	WB
26	HRP-conjugated Affinipure Goat Anti-Mouse IgG(H+L)	Anti-Mouse	Proteintech	SA00001-1	WB
27	HRP-conjugated Affinipure Goat Anti-Rabbit IgG(H+L)	Anti-Rabbit	Proteintech	SA00001-2	WB
28	Rabbit IgG control Polyclonal antibody	negative control	Proteintech	30000-0-AP	IP
29	Normal mouse IgG	negative control	Santa Cruz Biotechnology	sc-2025	IP
30	488-conjugated Goat Anti-Rabbit IgG (H+L)	Anti-Rabbit	Servicebio	GB25303	IF
31	594-conjugated Goat Anti-Mouse IgG (H+L)	Anti-Mouse	Servicebio	GB28303	IF

## Sheet: S3 siRNA and shRNA
Supplementary Table 3
No.	gene	Name in manuscript	Type	target region	target sequence
1	human ZC3H13	shZC3H13-1	shRNA	CDS	CCTCACAATCAGGATCATCTA
2	human ZC3H13	shZC3H13-2	shRNA	CDS	CCTCTCCTTATCCTTCACATT
3	mouse ZC3H13	shZC3H13-1	shRNA	CDS	GATTCTGACAATGGAGATATT
4	mouse ZC3H13	shZC3H13-2	shRNA	CDS	GAATCTTCAAGAGGGAGACAT
5	human METTL14	shMETTL14-1	shRNA	CDS	CCATGTACTTACAAGCCGATA
6	human METTL14	shMETTL14-2	shRNA	CDS	GCCGTGGACGAGAAAGAAATA
7	human PMEPA1	shPMEPA1-1	shRNA	CDS	GAGCAAAGAGAAGGATAAACA
8	human PMEPA1	shPMEPA1-2	shRNA	CDS	GAGTTTGTTCAGATCATCATC
9	Non-Targeting shRNA Controls	Scramble	shRNA		CAACAAGATGAAGAGCACCAA
10	human ZC3H13	ZC3H13-KD	siRNA	CDS	CCGAAGACCCAGTGTATTTTT
11	human NEDD4	siNEDD4	siRNA	CDS	GTGCAAATCATCAGGTTATTT
12	Non-Targeting sIRNA Controls	NC	siRNA		TTCTCCGAACGTGTCACGTTT

## Sheet: S4 Oligos
Supplementary Table 4
No.	Experiment	primer description	Sequence 5' to 3'
1	RT-qPCR(human)	ZC3H13-F	AAGGAGGTTTCACCAGAAGTG
2	RT-qPCR(human)	ZC3H13-R	ACGACTTCGGGCTTGATTT
3	RT-qPCR(mouse)	ZC3H13-F	GGTGCTTGGAGAGGAGTTCAA
4	RT-qPCR(mouse)	ZC3H13-R	GCCAAGCCTCTCAAATACGCT
5	RT-qPCR(human)	METTL14-F	GAACACAGAGCTTAAATCCCCA
6	RT-qPCR(human)	METTL14-R	TGTCAGCTAAACCTACATCCCTG
7	RT-qPCR(human)	PMEPA1-F	GTGCAACTGCAAACGCTCT
8	RT-qPCR(human)	PMEPA1-R	CAGGCATCCTTCTGAGGACA
9	RT-qPCR(human)	SMAD2-F	TGCTCTGAAATTTGGGGACTGA
10	RT-qPCR(human)	SMAD2-R	ACTGGAGGCAAAACTGGTGT
11	RT-qPCR(human)	SMAD3-F	CCATGTCGTCCATCCTGCC
12	RT-qPCR(human)	SMAD3-R	CCATCCAGGGACCTGGGGA
13	RT-qPCR(human)	CDH2-F	TGTTTGACTATGAAGGCAGTGG
14	RT-qPCR(human)	CDH2-R	TCAGTCATCACCTCCACCAT
15	RT-qPCR(human)	VIM-F	CGAAACTTCTCAGCATCACG
16	RT-qPCR(human)	VIM-R	GCAGAAAGGCACTTGAAAGC
17	RT-qPCR(human)	ZEB2-F	CGAGAAAGGGCACTTGGA
18	RT-qPCR(human)	ZEB2-R	CTCGTCGCCA TCCTGTCT
19	RT-qPCR(human)	TWIST1-F	AGCTACGCCTTCTCGGTGT
20	RT-qPCR(human)	TWIST1-R	CCTTCTCTGGAAACAA TGACA TC
21	RT-qPCR(human)	TWIST2-F	CGCCAGGGCTGTCCG
22	RT-qPCR(human)	TWIST2-R	TGTCCGATGTCACTGCTGTC
23	RT-qPCR(human)	SNAI2-F	CACCTCCTCCAAGGACCA
24	RT-qPCR(human)	SNAI2-R	GGCCAGCCCAGAAAAAGT
25	RT-qPCR(human)	GAPDH-F	CATGGCACCGTCAAGGCTG
26	RT-qPCR(human)	GAPDH-R	GACGAACATGGGGGCATCAG
27	RT-qPCR(human)	ACTIN-F	CTCTTCCAGCCTTCCTTCCT
28	RT-qPCR(human)	ACTIN-R	AGCACTGTGTTGGCGTACAG
29	RT-qPCR(mouse)	ACTIN-F	ggagggggttgaggtgtt
30	RT-qPCR(mouse)	ACTIN-R	gtgtgcacttttattggtctcaa
31	MeRIP-qPCR	PMEPA1-F	CTTCTCTTTGCTCCAGATGGC
32	MeRIP-qPCR	PMEPA1-R	CCCCAAACAGAACCATCTTCG
33	MeRIP-qPCR	SMAD2-F	CAGTCCATAGGGACCACACA
34	MeRIP-qPCR	SMAD2-R	TGGACCTCTACAGTGGTTGGA
35	MeRIP-qPCR	SMAD3-F	TGCACCCACCTGTTTTCTGA
36	MeRIP-qPCR	SMAD3-R	TCTTGCCCTTCAAAGTGGGG
37	MeRIP-qPCR	SETD7-F	GGGGTTCAGAGACCTGGAAT
38	MeRIP-qPCR	SETD7-R	GCATGGTGAGAGGATGTGAC
39	MeRIP-qPCR	GAPDH-F	TCAAGGCTGAGAACGGGAAG
40	MeRIP-qPCR	GAPDH-R	GGACTCCACGACGTACTCAG
41	Mouse genotyping	ZC3H13-5'arm-F	TCTGCTTAGGCACAACTCAGACGTTTG
42	Mouse genotyping	ZC3H13-5'arm-R	ACAGATGACTGTTAGCTACCCTGTAGG
43	Mouse genotyping	ZC3H13-3'arm-F	GTTTCAATCAGATCCCTCCACCAG
44	Mouse genotyping	ZC3H13-3'arm-R	ATGGTGGAACACATCTGTAACGCAGTAC
45	Mouse genotyping	PTEN-F	TGTTTTTGACCAATTAAAGTAGGCTGTG
46	Mouse genotyping	PTEN-R	AAAAGTTCCCCTGCTGATGATTTGT
47	Mouse genotyping	Pbsn;iCre-5’arm-F	GGGCAGTCTGGTACTTCCAAGCT
48	Mouse genotyping	Pbsn;iCre-5’arm-R	GCAGTGTCTTGCATCCCAGTTG
49	Mouse genotyping	Pbsn;iCre-WT-F	CAGCAAAACCTGGCTGTGGATC
50	Mouse genotyping	Pbsn;iCre-WT-R	ATGAGCCACCATGTGGGTGTC
